# Supplementary material
Source: PubMed Central journal article supplement (PMC3785713)
Supplement: jmedgenet-2013-101713-s1.pdf [file jmedgenet-2013-101713-s1.pdf]

| Disease                                   | Gene/Locus1       | Inh.       | Gene/Locus2          | Inh.       | Gene Interaction | Loci Linked | Pedigree evidence | Replication      | Ref.       |
|-------------------------------------------|-------------------|------------|----------------------|------------|------------------|-------------|-------------------|------------------|------------|
| Long QT syndrome (LQTS)                   | <i>KCNH2/7q</i>   | AD         | <i>KCNQ1/11p</i>     | AD         | Protein-protein  | No          | Minimal           | Yes              | 22         |
| LQTS                                      | various LQT genes | AD         | various LQT genes    | AD         | Protein-protein  | No          | Yes               | Yes              | 23-26      |
| Deafness                                  | <i>GJB2/13q</i>   | AD         | <i>GJB6/13q</i>      | AD         | Protein-protein  | Yes         | Yes               | DNA level        | 9<br>50-52 |
| Deafness                                  | <i>GJB2/13q</i>   | AD         | <i>GJB3/1p</i>       | AD         | Protein-protein  | No          | Minimal           | Of prior studies | 53         |
| Deafness                                  | <i>TECTA/11q</i>  | AD         | 1p                   | AD         | NA               | No          | Yes               | No               | 30<br>31   |
| Pendred syndrome/deafness                 | <i>SLC26A4/7q</i> | AD         | <i>FOXI1/5q</i>      | AD         | Protein-DNA      | No          | No                | No               | 87         |
| Deafness suppression                      | 1q                | AR         | 4q                   | AR         | NA               | No          | Yes               | No               | 72         |
| Deafness                                  | <i>CDH23/10q</i>  | AR         | <i>ATP2B2/3p</i>     | AD         | ?                | No          | Yes               | Partial          | 49         |
| Usher syndrome                            | <i>MYO7A/11q</i>  | AR         | 3q                   | AD         | ?                | No          | Minimal           | No               | 88         |
| Usher syndrome                            | <i>CDH23/10q</i>  | AD         | <i>PCDH15/10q</i>    | AD         | ?                | Yes         | Yes               | Yes              | 27         |
| Usher syndrome                            | <i>CDH23/10q</i>  | AD         | <i>PCDH15/10q</i>    | AD         | ?                | Yes         | No                | Of prior study   | S1         |
| Usher syndrome                            | <i>PDZD7/10q</i>  | variable   | <i>GPR98/5q</i>      | variable   | Protein-protein  | No          | Yes               | Internal         | 89         |
| Bartter's syndrome (antenatal w/deafness) | <i>CLCNKA/1p</i>  | AR         | <i>CLCNKB/1p</i>     | AR         | Pathway          | Yes         | Minimal           | Yes              | 90<br>S2   |
| Bardet-Biedl syndrome                     | <i>BBS2/16q</i>   | Triallelic | various BBS loci     | triallelic | Protein-protein  | No          | Minimal           | Yes              | 8          |
| Bardet-Biedl syndrome                     | <i>BBS4/15q</i>   | variable   | various BBS genes    | variable   | Protein-protein  | No          | Minimal           | Yes              | 61         |
| Bardet-Biedl syndrome                     | <i>BBS1/11q</i>   | variable   | various BBS genes    | variable   | Protein-protein  | No          | Yes               | Yes              | 62         |
| Bardet-Biedl syndrome                     | various BBS genes | variable   | various BBS genes    | variable   | Protein-protein  | No          | No                | Of prior studies | S3         |
| Bardet-Biedl syndrome                     | various BBS genes | AR         | <i>CCDC28B/1p</i>    | variable   | Protein-protein  | No          | Minimal           | Internal         | 64         |
| Bardet-Biedl syndrome                     | <i>BBS7/4q</i>    | AR         | various BBS genes    | AD         | Protein-protein  | No          | Minimal           | Of prior studies | S4         |
| Bardet-Biedl syndrome (+ciliopathies)     | various BBS genes | variable   | various BBS genes    | variable   | Protein-protein  | No          | Minimal           | Of prior studies | 19         |
| Bardet-Biedl syndrome                     | various BBS genes | triallelic | various BBS genes    | triallelic | Protein-protein  | No          | Minimal           | Of prior studies | 20         |
| Bardet-Biedl syndrome                     | various BBS genes | triallelic | various BBS genes    | triallelic | Protein-protein  | No          | Not shown         | Of prior studies | S5         |
| Joubert syndrome (+ciliopathies)          | <i>CEP41/7q</i>   | AD         | various genes        | various    | Pathway          | No          | No                | No               | 65         |
| Leber's congenital                        | <i>CEP290/12q</i> | AR         | <i>MKKS/BBS6/20p</i> | AD         | Protein-protein  | No          | No                | Internal         | 66         |

| amaurosis(+ciliopathies)           |                      |                  |                      |                  |                  |     |         |                  |           |
|------------------------------------|----------------------|------------------|----------------------|------------------|------------------|-----|---------|------------------|-----------|
| Short-rib polydactyly (ciliopathy) | <i>NEK1/4q</i>       | AD               | <i>DYNC2H1/11q</i>   | AD               | Pathway          | No  | No      | No               | 67        |
| Nephrotic syndrome                 | <i>NPHS1/19q</i>     | triallelic       | <i>NPHS2/1q</i>      | triallelic       | Protein-protein  | No  | Minimal | Yes              | 68        |
| Nephrotic syndrome                 | <i>NPHS1/19q</i>     | triallelic       | <i>NPHS2/1q</i>      | triallelic       | Protein--protein | No  | Minimal | Of prior study   | S6        |
| Nephrotic syndrome                 | various genes        | various          | various genes        | various          | Protein-protein  | No  | Minimal | Of prior studies | S7        |
| Hypogonadotropic hypogonadism      | <i>PROKR2/20p</i>    | AD               | <i>KALI/Xp</i>       | XLR              | No               | No  | Minimal | Yes              | 69        |
| Hypogonadotropic hypogonadism      | <i>FGFR1/8p</i>      | AD               | <i>NSMD/9q</i>       | AD               | No               | No  | Minimal | Yes              | 70        |
| Hypogonadotropic hypogonadism      | <i>PROKR2/20p</i>    | AD               | <i>KALI/Xp</i>       | XLR              | No               | No  | Minimal | Of prior studies | S8        |
| Hypogonadotropic hypogonadism      | various HH genes     | AD or triallelic | various HH genes     | AD or triallelic | No               | No  | No      | Yes              | S9        |
| Hypogonadotropic hypogonadism      | <i>NSMD/9q</i>       | AD               | <i>KALI/Xp</i>       | XLR              | No               | No  | No      | Of prior studies | S10       |
| Hypogonadotropic hypogonadism      | <i>NSMD/9q</i>       | AD               | <i>TACR3/4q</i>      | AD               | No               | No  | No      | Of prior studies | S10       |
| Hypogonadotropic hypogonadism      | <i>PROKR2/20p</i>    | AD               | <i>FGFR1/8p</i>      | AD               | No               | No  | No      | Of prior studies | S11       |
| Hypogonadotropic hypogonadism      | <i>FGF8</i> -related | AD               | <i>FGF8</i> -related | AD               | Pathways         | No  | No      | Internal         | 71        |
| Hypogonadotropic hypo. (syndromic) | <i>RNF216/7p</i>     | AR               | <i>OTUD4/4q</i>      | AD               | Pathway          | No  | Yes     | No               | 17        |
| Hirschsprung disease               | <i>RET/10q</i>       | AD               | <i>EDNRB/13q</i>     | AD               | Pathways?        | No  | Minimal | Yes              | 91        |
| Hirschsprung disease               | <i>RET/10q</i>       | AD               | <i>EDNRB/13q</i>     | AD               | Pathways?        | No  | Yes     | Yes              | S12       |
| Hirschsprung disease               | <i>RET/10q</i>       | AD               | <i>EDNRB/EDN3</i>    | AD               | Pathways?        | No  | Minimal | Of prior studies | S13       |
| Parkinson's disease                | <i>PARK7/1p</i>      | AD               | <i>PINK1/1p</i>      | AD               | Protein-protein  | Yes | Minimal | No               | 92        |
| Parkinson's disease                | <i>PARKIN/6q</i>     | AR               | <i>PINK1/1p</i>      | AD               | Same pathway?    | No  | Minimal | No               | S14       |
| Retinitis pigmentosa               | <i>PRPH2/6p</i>      | AD               | <i>ROM1/11q</i>      | AD               | Protein-protein  | No  | Yes     | Internal         | 7         |
| Glaucoma (earlier onset)           | <i>MYOC/1q</i>       | AD               | <i>CYP1B1/2p</i>     | AD               | No               | No  | Yes     | Yes              | 93<br>S15 |
| Waardenburg syndrome/albinism      | <i>MITF/3p</i>       | AD               | <i>TYR/11q</i>       | AD               | Protein-DNA      | No  | Minimal | Partial          | 94        |
| Oculocutaneous albinism (OCA)      | <i>TYR/11q</i>       | triallelic       | <i>OCA2/15q</i>      | triallelic       | Pathway          | No  | No      | Partial          | 95        |
| Oculocutaneous albinism (OCA)      | three OCA genes      | AD               | three OCA genes      | AD               | Pathway          | No  | No      | Internal         | S16       |

|                                            |                    |            |                   |            |                 |        |         |                  |            |
|--------------------------------------------|--------------------|------------|-------------------|------------|-----------------|--------|---------|------------------|------------|
| Junctional epidermolysis bullosa           | <i>COL17A1/10q</i> | AR         | <i>LAMB3/1q</i>   | AD         | Protein-protein | No     | No      | No               | 96         |
| Disfibrinogenemia (slow clotting)          | <i>FGA/4q</i>      | AD         | <i>FGG/4q</i>     | AD         | Protein-protein | Yes    | No      | No               | 97         |
| Polycystic kidney disease                  | <i>PKD1/16p</i>    | AD         | <i>PKD2/4q</i>    | AD         | Protein-protein | No     | Yes     | No               | 98         |
| Holoprosencephaly                          | <i>SHH/7q</i>      | AD         | <i>TGIF1/18p</i>  | AD         | Pathway         | No     | Minimal | Internal         | 11         |
| Holoprosencephaly                          | <i>SHH/7q</i>      | AD         | <i>ZIC2/13q</i>   | AD         | Pathway         | No     | Minimal | No               | 11         |
| Familial hypercholesterol. suppression     | <i>LDLR/19p</i>    | AD         | 13q               | AR         | NA              | No     | Yes     | No               | 73         |
| High LDL                                   | <i>LDLRAP1/1p</i>  | AR         | 13q               | AR         | NA              | No     | Yes     | Internal         | 64         |
| Cystinuria                                 | <i>SLC3A1/2p</i>   | triallelic | <i>SLC7A9/19q</i> | triallelic | Protein-protein | No     | Minimal | Yes              | 99         |
| Cystinuria                                 | <i>SLC3A1/2p</i>   | triallelic | <i>SLC7A9/19q</i> | triallelic | Protein-protein | No     | No      | Of prior study   | S17        |
| Hyperinsulinemia                           | <i>PPARG/3p</i>    | AD         | <i>PPP1R3A/7q</i> | AD         | No              | No     | Minimal | No               | 100        |
| Hypercholanemia                            | <i>TJP2/9q</i>     | AR         | <i>BAAT/9q</i>    | AD         | No              | Weakly | Yes     | No               | 79         |
| Pheochromocytoma                           | <i>TMEM127/2q</i>  | AR*        | 16p               | AR         | NA              | No     | Yes     | No               | 32<br>33   |
| Familial exudative vitreoretinopathy(FEVR) | <i>FZD4/11q</i>    | AD         | <i>F5/1q</i>      | AD         | No              | No     | Minimal | No               | 101        |
| Familial exudative vitreoretinopathy(FEVR) | <i>FZD4/11q</i>    | AD         | <i>LRP5/11q</i>   | AD         | Pathway         | Yes    | Minimal | No               | 77         |
| Factor VIII thromboembolism                | 5q                 | optimized  | 11q               | optimized  | NA              | No     | Yes     | No               | 102        |
| PMP22-related neuropathies                 | <i>PMP22/17p</i>   | AD         | various genes     | AD or XLR  | No              | No     | Minimal | Partial          | 103<br>104 |
| PMP22-related neuropathy                   | <i>PMP22/17p</i>   | AD         | <i>MPZ/1q</i>     | AD         | No              | No     | Minimal | Of prior study   | S18        |
| Charcot-Marie-Tooth disease (non-PMP22)    | <i>MFN2/1p</i>     | AD         | <i>GDAP1/8q</i>   | AD         | No              | No     | Minimal | No               | 105        |
| Emery-Dreifuss muscular dystrophy          | <i>LMNA/1q</i>     | AD         | <i>EMD/Xq</i>     | XLR        | Protein-protein | No     | Minimal | Yes              | 106        |
| Emery-Dreifuss muscular dystrophy          | <i>LMNA/1q</i>     | AR         | <i>EMD/Xq</i>     | XLR        | Protein-protein | No     | Yes     | Of prior study   | S19        |
| Porphyria (acute)                          | various genes      | various    | <i>HFE/6p</i>     | AD         | Pathway         | No     | No      | At pathway level | 107        |
| Porphyria (acute)                          | <i>UROD/1p</i>     | AD         | <i>HMBS/11q</i>   | AD         | Pathway         | No     | No      | At pathway level | 108        |
| Porphyria (acute)                          | <i>CPOX/3q</i>     | AD         | <i>ALAD/9q</i>    | AD         | Pathway         | No     | Minimal | At pathway level | 109        |
| Porphyria (acute)                          | <i>PPOX/1q</i>     | AD         | <i>CPOX/3q</i>    | AD         | Pathway         | No     | Minimal | Of prior studies | S20        |
| Epilepsy w/febrile seizures                | 1q                 | AD         | 18q               | AD         | NA              | No     | Yes     | No               | 110        |

|                                               |                    |           |                    |           |                  |        |         |          |                   |
|-----------------------------------------------|--------------------|-----------|--------------------|-----------|------------------|--------|---------|----------|-------------------|
| Hemochromatosis                               | <i>HFE/6p</i>      | various   | <i>HAMP/19q</i>    | AD        | Pathway          | No     | Minimal | No       | 111               |
| Progressive external ophthalmoplegia (PEO)    | <i>C10orf2/10q</i> | AD        | <i>POLG/15q</i>    | AD        | No               | No     | No      | No       | 112               |
| Epilepsy w/febrile seizures                   | <i>SCN1A/2q</i>    | AD        | <i>SCN2A/2q</i>    | AD        | No               | Yes    | Minimal | No       | 113               |
| Photosensitivity in epilepsy                  | 7q                 | optimized | 16p                | optimized | NA               | No     | Yes     | No       | 114               |
| Split-hand/foot malformation                  | 1q                 | AD        | 6q                 | AD        | NA               | No     | Yes     | No       | 115               |
| Iminoglycinuria                               | <i>SLC36A2/5q</i>  | AR        | <i>SLC6A20/3p</i>  | AD        | Pathway          | No     | Yes     | Internal | 116               |
| Keratoconus                                   | 1p                 | AD        | 8q                 | AD        | NA               | No     | Yes     | No       | 117               |
| Limb-girdle muscular dystrophy                | <i>SGCB/4q</i>     | AD        | <i>SGCD/5q</i>     | AD        | Protein-protein  | No     | No      | No       | 118               |
| Ullrich congenital muscular dystrophy         | <i>COL6A1/21q</i>  | AD        | <i>COL6A2/21q</i>  | AD        | Protein-protein  | Yes    | No      | No       | 119               |
| Pseudoxanthoma elasticum                      | <i>ABCC6/16p</i>   | AD        | <i>GGCX/2p</i>     | AD        | No               | No     | Minimal | No       | 120               |
| Hereditary motor neuropathy                   | <i>DSCL2/11q</i>   | AD        | 16p                | AD        | NA               | No     | Yes     | No       | 121               |
| Cleft lip                                     | 1q                 | AD        | 2p                 | AD        | NA               | No     | Yes     | No       | 122               |
| Fuchs corneal dystrophy                       | <i>ZEB1/10p</i>    | AD        | 9p                 | AD        | NA               | No     | Yes     | No       | 29                |
| Axenfeld-Rieger syndrome                      | <i>PITX2/4q</i>    | AD        | <i>FOXC1/6p</i>    | AD        | Protein-protein  | No     | Minimal | No       | 123               |
| Colorectal cancer                             | <i>MUTYH/1p</i>    | AD        | <i>OGG1/3p</i>     | AD        | Pathway          | No     | Minimal | No       | 124               |
| Rotor syndrome (hyperbilirubinemia)           | <i>SLCO1B1/12p</i> | AR        | <i>SLCO1B3/12p</i> | AR        | Pathway          | Yes    | Yes     | Internal | 28                |
| Dent's disease                                | <i>CLCN5/Xp</i>    | XLR       | <i>OCRL/Xq</i>     | XLR       | Pathway?         | Weakly | Minimal | No       | 78                |
| Facioscapulohumeral muscular dystrophy type 2 | <i>DUX4/4q</i>     | AD        | <i>SMCHD1/18p</i>  | AD        | Protein/DNA      | No     | Yes     | Internal | 16                |
| Epidermolysis bullosa simplex                 | <i>KRT5/12q</i>    | AD        | <i>KRT14/17q</i>   | AD        | Protein-protein  | No     | Minimal | No       | 125               |
| Melanoma susceptibility                       | <i>CDKN2A/9p</i>   | AD        | <i>MC1R/16q</i>    | various   | No               | No     | Yes     | Yes      | 21<br>S21-<br>S23 |
| Hypotrichosis (nonsyndromic)                  | <i>CDH3/16q</i>    | AR        | 12q                | AR        | NA               | No     | Yes     | Internal | 75                |
| Cone rod dystrophy & deafness                 | <i>MERTK/2q</i>    | AR        | <i>DFNB59/2q</i>   | AR        | No, two diseases | Weakly | Yes     | No       | 80                |
| Oculocutaneous albinism & cytopenia           | <i>SLC45A2/5p</i>  | AR        | <i>G6PC3/17q</i>   | AR        | No, two diseases | No     | Minimal | No       | 43                |

Online Supplementary Table S1. This is an extended version of Table 1 with a catalog of publications of cases of human digenic inheritance. The extended version includes extra rows for multiple gene pairs in the same paper and for replication studies. The extended version includes extra columns to describe the mode of inheritance at each locus and whether the genes/proteins are known to interact. The possible modes of inheritance are: AD (autosomal dominant), AR (autosomal recessive), XLR (X-linked recessive), triallelic (two variant alleles in one gene and one variant allele in the other gene), or optimized (the penetrance function or other parameters used for genetic linkage analysis were determined by some numerical optimization procedure using at least some of the pedigree data as input). References with only numbers are in the References of the main document. References cited only in Table S1 are listed below it with indices S1 through S23.

## References cited only in online supplementary table S1

- S1 Vozzi D, Aaspõllu A, Athanasakis E, Berto A, Fabretto A, Licastro D, Külm M, Testa F, Trevisi P, Vahter M, Ziviello C, Martini A, Simonelli F, Banfi S, Gasparini P. Molecular epidemiology of Usher syndrome in Italy. *Mol Vis* 2011;17:1662-8.
- S2 Nozu K, Inagaki T, Fu XJ, Nozu Y, Kaito H, Kanda K, Sekine T, Igarashi T, Nakanishi K, Yoshikawa N, Iijima K, Matsuo M. Molecular analysis of digenic inheritance in Bartter syndrome with sensorineural deafness. *J Med Genet* 2008;45:182-6.
- S3 Fauser S, Munz M, Besch D. Further support for digenic inheritance in Bardet-Biedl syndrome. *J Med Genet* 2003;40:e104.
- S4 Bin J, Madhavan J, Ferrini W, Mok CA, Billingsley G, Héon E. BBS7 and TTC8 (BBS8) mutations play a minor role in the mutational load of Bardet-Biedl syndrome in a multiethnic population. *Hum Mutat* 2009;30:E737-46.
- S5 Chen J, Smaoui N, Hammer MB, Jiao X, Riazuddin SA, Harper S, Katsanis N, Riazuddin S, Chaabouni H, Berson EL, Hejtmancik JF. Molecular analysis of Bardet-Biedl syndrome families: report of 21 novel mutations in 10 genes. *Invest Ophthalmol Vis Sci* 2011;52:5317-24.
- S6 Weber S, Gribouval O, Esquivel EL, Morinière V, Tête MJ, Legendre C, Niaudet P, Antignac C. NPHS2 mutation analysis shows genetic heterogeneity of steroid-resistant nephrotic syndrome and low post-transplant recurrence. *Kidney Int* 2004;66:571-9.
- S7 Löwik M, Levtchenko E, Westra D, Groenen P, Steenbergen E, Weening J, Lilien M, Monnens L, van den Heuvel L. Bigenic heterozygosity and the development of steroid-resistant focal segmental glomerulosclerosis. *Nephrol Dial Transplant* 2008;23:3146-51.
- S8 Canto P, Munguía P, Söderlund D, Castro JJ, Méndez JP. Genetic analysis in patients with Kallmann syndrome: coexistence of mutations in prokineticin receptor 2 and *KALI*. *J Androl* 2009;30:41-5.
- S9 Sykiotis GP, Plummer L, Hughes VA, Au M, Durrani S, Nayak-Young S, Dwyer AA, Quinton R, Hall JE, Gusella JF, Seminara SB, Crowley WF Jr, Pitteloud N. Oligogenic basis of isolated gonadotropin-releasing hormone deficiency. *Proc Natl Acad Sci USA* 2010;107:15140-4.

- S10 Xu N, Kim H-G, Bhagavath B, Cho S-G, Lee JH, Ha K, Meliciani I, Wenzel W, Podolsky RH, Chorich LP, Stackhouse KA, Grove AMH, Odom LN, Ozata M, Bick DP, Sherins RJ, Kim S-H, Cameron RS, Layman LC. Nasal embryonic LHRH factor (NELF) mutations in patients with normosmic hypogonadotropic hypogonadism and Kallmann syndrome. *Fertil Steril* 2011;95:1613-20.
- S11 Avbelj Stefanija M, Jeanpierre M, Sykiotis GP, Young J, Quinton R, Abreu AP, Plummer L, Au MG, Balasubramanian R, Dwyer AA, Florez JC, Cheetham T, Pearce SH, Purushothaman R, Schinzel A, Pugeat M, Jacobson-Dickman EE, Ten S, Latronico AC, Gusella JF, Dode C, Crowley WF Jr, Pitteloud N. *Hum Mol Genet* 2012;21:4314-24.
- S12 Carrasquillo MM, McCallion AS, Puffenberger EG, Kashuk CS, Nouri N, Chakravarti A. Genome-wide association study and mouse model identify interaction between RET and EDNRB pathways in Hirschsprung disease. *Nat Genet* 2002;32:237-44.
- S13 Garcia-Barceló M, Sham MH, Lee WS, Lui VC, Chen BL, Wong KK, Wong JS, Tam PK. Highly recurrent RET mutations and novel mutations in genes of the receptor tyrosine kinase and Endothelin Receptor B pathways in Chinese patients with sporadic Hirschsprung disease. *Clin Chem* 2004;50:93-100.
- S14 Funayama M, Li Y, Tsoi TH, Lam CW, Ohi T, Yazawa S, Uyama E, Djaldetti R, Melamed E, Yoshino H, Imamichi Y, Takashima H, Nishioka K, Sato K, Tomiyama H, Kubo S, Mizuno Y, Hattori N. Familial Parkinsonism with digenic *Parkin* and *PINK1* mutations. *Mov Disord* 2008;23:1461-5.
- S15 Kaur K, Reddy ABM, Mukhopadhyay A, Mandal AK, Hasnain SE, Ray K, Thomas R, Balasubramanian D, Chakrabarti S. Myocilin gene implicated in primary congenital glaucoma. *Clin Genet* 2005;67:335-40.
- S16 Wei AH, Yang XM, Lian S, Li W. Genetic analyses of Chinese patients with digenic oculocutaneous albinism. *Chin Med J* 2013;126:226-30.
- S17 Gucev Z, Ristoska-Bojkovska N, Popovska-Jankovic K, Sukarova-Stefanovska E, Tasic V, Plaseska-Karanfilska D, Efremov GD. Cystinuria AA (B): digenic inheritance with three mutations in two cystinuria genes. *J Genet* 2011;90:157-9.
- S18 Young T, Shuey N, Partridge J, Bremner FD, Nicholl DJ. Compound Charcot-Marie-Tooth disease: a kindred with severe hereditary neuropathy, pupil abnormalities and a novel MPZ mutation. *J Neurol Neurosurg Psychiatry* 2013;84:234-6.

- S19 Ben Yaou R, Toutain A, Arimura T, Demay L, Massart C, Peccate C, Muchir A, Llense S, Deburgrave N, Leturcq F, Litim KE, Rahmoun-Chiali N, Richard P, Babuty D, Récan-Budiartha D, Bonne G. Multitissular involvement in a family with *LMNA* and *EMD* mutations: Role of digenic mechanism? *Neurology* 2007;68:1883-94.
- S20 van Tuyll van Serooskerken AM, de Rooij FW, Edixhoven A, Bladergroen RS, Baron JM, Joussen S, Merk HF, Steijlen PM, Poblete-Gutiérrez P, te Velde K, Wilson JHP, Koole RH, van Geel M, Frank J. Digenic inheritance of mutations in the *coproporphyrinogen oxidase* and *protoporphyrinogen oxidase* genes in a unique type of porphyria. *J Invest Dermatol* 2011;131:2249-54.
- S21 Peris K, Fargnoli MC, Pacifico A, Surrenti T, Stolz W, Wolf P, Soyer HP, Chimenti S. *CDKN2A* and *MC1R* mutations in patients with sporadic multiple primary melanoma. *J Invest Dermatol* 2004;122:1327-1330.
- S22 Demenais F, Mohamdi H, Chaudru V, Goldstein AM, Newton Bishop JA, Bishop DT, Kanetsky PA, Hayward NK, Gillanders E, Elder DE, Avril MF, Azizi E, van Belle P, Bergman W, Bianchi-Scarrà G, Bressac-de Paillerets B, Calista D, Carrera C, Hansson J, Harland M, Hogg D, Höiom V, Holland EA, Ingvar C, Landi MT, Lang JM, Mackie RM, Mann GJ, Ming ME, Njauw CJ, Olsson H, Palmer J, Pastorino L, Puig S, Randerson-Moor J, Stark M, Tsao H, Tucker MA, van der Velden P, Yang XR, Gruis N; Melanoma Genetics Consortium. Association of *MC1R* variants and host phenotypes with melanoma risk in *CDKN2A* mutation carriers: a GenoMEL study. *J Natl Cancer Inst* 2010;102:1568-83.
- S23 Helsing P, Nymoén DA, Rootwelt H, Vårdal M, Akslen LA, Molven A, Andresen PA. *MC1R*, *ASIP*, *TYR*, and *TYRP1* gene variants in a population-based series of multiple primary melanomas. *Genes Chromosomes Cancer* 2012;51:654-61.
